# Supplementary material for: From isolation to collaboration: how study methods shape learning outcome
Source: Research Square preprint supplement (doi:10.21203/rs.3.rs-8001231/v1), 2026-01-09
Supplement: Supplementary file 1 [file bb23e54020dafe1afec5bfee.docx]

**Questionnaire**

**From Isolation to Collaboration: How Study Methods**

**Shape Learning Outcomes**

Gender=female/male. Age=……… Stage=…….

1. **-How often do you participate in collaborative study sessions with peers?**
   - Never
   - Rarely
   - Occasionally
   - Frequently
   - Always
2. -**To what extent do you believe that collaborative study helps improve your understanding of the material?**

ɐ

- - - Not at all
  - - A little
  - - Moderately
  - - Very much
  - - Extremely

1. -**How do you rate the impact of collaborative study on your overall academic performance?**
   - - Very negative
   - - Somewhat negative
   - - Neutral
   - - Somewhat positive
   - - Very positive
2. **-What aspects of collaborative study do you find most beneficial? (Select all that apply)**
   - - Enhanced understanding of concepts
   - - Improved retention of information
   - - Increased motivation
   - - Greater accountability
   - - Development of teamwork skills
3. **-In your opinion, how does collaborative study affect your grades?**

- Significantly decreases grades

- - - Mildly decreases grades
  - - No effect
  - - Mildly increases grades
  - - Significantly increases grades

6- **How well do you feel you contribute to collaborative study sessions?**

- - - Not at all
  - - A little
  - - Moderately
  - - Very well
  - - Extremely well

7**-What challenges do you face while studying collaboratively? (Select all that apply)**

- - - Conflicting schedules
  - - Different learning paces
  - - Distractions from peers
  - - Lack of participation
  - - Other (please specify)

1. -**How does the diversity of your study group influence the learning experience?**
   - - Very negatively
   - - Somewhat negatively
   - - No impact
   - - Somewhat positively
   - - Very positively
2. **-Do you feel more prepared for exams or assignments after collaborating with others?**

Not at all prepared

ɐ

- - - Somewhat prepared
  - - Neutral
  - - Mostly prepared
  - - Very prepared

1. **-What changes would you suggest to improve collaborative study sessions?**

ɐ

- - - More structured guidelines
  - - More frequent sessions
  - - Smaller group sizes
  - - Specific topics for each session
  - - Other (please specify)
  - …………………………………………………………………………..

1. -**What study methods do you primarily use? (Select all that apply)**
   - - Individual Study
   - - Group Study
   - - Online Resources
   - - Hands-on Practice
   - - Others (please specify)
   - ……………………………………………………………………………
2. **-When studying in a group, what roles do you typically take on? (Select all that apply**)
   - - Leader
   - - Note-taker
   - - Presenter
   - - Researcher

- - Other (please specify)
- …………………………………………………………………………..

1. **-Have you ever felt confused or misunderstood during collaborative study?**
   - - Always
   - - Often
   - - Sometimes
   - - Rarely
   - - Never
2. **-Regarding active collaborative learning, meetings planning & scheduling:**

- -I'm always available and ready.
- -Sometimes I struggle with coordinating my time between obligations & these meetings. But I try to manage.
- -I don't plan priory, it just happens spontaneously if the time and place were

favorable.

**References:**

1. Gillies RM. Cooperative learning: review of research and practice. Aust J Teach Educ. 2016;41 (3):39-51. doi:10.14221/ ajte.2016v41n3.3.
2. Jafari H, Aghaei A, Khatony A. Relationship between study habits and academic achievement in students of medical sciences in Kermanshah-Iran. Adv Med Educ Pract. 2019;10:637-643. doi: 10.2147/AMEP.S205710.
3. Rabia M, Mubarak T, Tallat N. Study habits as behaviors and techniques that involve time management and effective strategies. East Afr J Educ Soc Sci. 2022;3(3)
4. Roseth CJ, Johnson DW, Johnson RT. Promoting cooperative learning in higher education: A review of research and practical recommendations. High Educ. 2023;76(1):1-18.
5. Kirschner FC, Paas F, Kirschner PA. Individual and group-based learning from complex cognitive tasks: effects on retention and transfer efficiency. Comput Hum Behav. In press
6. Slavin, R. E. (2014). Cooperative learning and academic achievement: Why does groupwork work? *Anales de Psicología*, 30(3), 785-791. doi:10.6018/analesps.30.3.201201**
7. Johnson, D. W., & Johnson, R. T. (1999). Learning together and alone: Cooperative, competitive, and individualistic learning (5th ed.). Boston: Allyn and Bacon.**
8. Smith, J., Brown, T., & Taylor, R. (2020). Challenges in collaborative learning: Aligning different learning paces. *Journal of Educational Research, 45*(3), 123–135.
